# Supplementary material for: Sex differences in patterns of relations between family interactions and depressive symptoms in adolescents
Source: PubMed Central journal article supplement (PMC3160708; doi:10.3325/cmj.2011.52.469), 2011-08
Supplement: CroatMedJ_52_s001.pdf [file CroatMedJ_52_s001.pdf]

**Appendix**  
**Content of scales**

**Depressive symptoms (*Cronbach alpha=.88*)**

***Depressiveness - Somatic Symptoms***

I am sad and depressed

I feel tired and exhausted

I feel sluggish and slow

I am nervous and anxious

***Loneliness***

I don't feel that I belong to the world I live in

Nobody understands me

I have no one to turn to

I feel abandoned

***Existential crises***

Life is mainly very boring

I had thoughts about committing suicide

I think I am not worth anything

**Family activities (*Cronbach alpha=.85*)**

We attend sports events or do sports activities

We go to the theatre or to the cinema

We play games

We go for walks

We study and write homework together

We go for family trips and excursions

We watch TV

We eat lunch or dinner together

We talk and have discussions

We spend summer/winter holidays together

We go shopping together

**Parental warmth and affection (*Mother - Cronbach alpha=.87; Father - Cronbach alpha=.87*)**

I can count on her/his help  
She/he has understanding for my feelings  
She/he is honest  
I always feel protected around her/him  
She/he openly expresses positive emotions and warmth  
She/he notices when I'm upset about something

**Parental aggression and hostility (*Mother - Cronbach alpha=.75; Father - Cronbach alpha=.79*)**

She/he constantly has objections to my actions  
She/he is not satisfied with whatever I do  
She/he yells at me  
She/he punishes me even when I haven't done anything wrong  
She/he doesn't allow me to do things which are allowed to my peers

**Parental conflict strategy – Constructive mode (*Cronbach alpha=.72*)**

They negotiate  
They give explanations for their point of view  
They try to listen to each other

**Parental conflict strategy – Destructive mode (*Cronbach alpha=.83*)**

They threaten each other  
They insult each other  
They yell at each other  
They try to win me over to their side  
They get into physical conflict  
They question me about what the other does/thinks/says
